# Supplementary material for: Complete Multilineage CD4 Expression Defect Associated With Warts Due to an Inherited Homozygous CD4 Gene Mutation
Source: PubMed Central journal article supplement (PMC6856949; doi:10.3389/fimmu.2019.02502), 2019-11-08
Supplement: Table_1.pdf [file Table_1.pdf]

**Supplementary Table 1. Sequences of the mRNA and DNA pairs of primers used in this study and their corresponding amplicon length and annealing temperature.**

| mRNA primers |                       |                      |                       |
|--------------|-----------------------|----------------------|-----------------------|
| Name         | Sequence 5'           | Amplicon length (bp) | Annealing Temperature |
| cDNA_CD4-1Fw | ATGAACCGGGGAGTCCCTTT  | 479                  | 55°C                  |
| cDNA_CD4-1Rv | GCAATGTAGGAGTCCAAGGGG |                      |                       |
| cDNA_CD4-2Fw | CCTGGTAGTAGCCCTCAGT   | 379                  | 55°C                  |
| cDNA_CD4-2Rv | TACCCAGGACCCTAAGCTCC  |                      |                       |
| cDNA_CD4-3Fw | AAAACGGGTACCCAGGACC   | 268                  | 55°C                  |
| cDNA_CD4-3Rv | ACAAGGAGGCAAAGGTCTCG  |                      |                       |
| cDNA_CD4-4Fw | GAGCCACTCAGCTCCAGAAA  | 420                  | 55°C                  |
| cDNA_CD4-4Rv | TCAGAAGACATGTAGCCCCA  |                      |                       |
| DNA primers  |                       |                      |                       |
| Name         | Sequence 5'           | Amplicon length (bp) | Annealing Temperature |
| DNA_CD4-1Fw  | ACCCCAAACGCTGTTTTTC   | 461                  | 55°C                  |
| DNA_CD4-1Rv  | ACACCATACCATAACCCC    |                      |                       |
| DNA_CD4-2Fw  | AGAAGTGATGAAGTGAGGTGG | 302                  | 58°C                  |
| DNA_CD4-2Rv  | TGAGAGTGTGGGTGTGAGTG  |                      |                       |
| DNA_CD4-3Fw  | CACACACATCACTCACACAC  | 522                  | 55°C                  |
| DNA_CD4-3Rv  | GCATATCCATATCCAGGGCAC |                      |                       |
| DNA_CD4-4Fw  | CATGCACTCACACACACAGC  | 500                  | 55°C                  |
| DNA_CD4-4Rv  | GCAGCAAGGGAACCTACGAG  |                      |                       |
| DNA_CD4-5Fw  | GCCATGTAAGTCTTCTCC    | 382                  | 52°C                  |
| DNA_CD4-5Rv  | ATCTTTTCCCACCCCTCTATC |                      |                       |

**Supplementary Table 2. Normalized CD4 expression levels in CD4<sup>+</sup> T-cells, monocytes and dendritic cells of the patient's relatives, using different anti-CD4 clones.**

| Anti-CD4 Clone | Subset evaluated               | Daughter<br>(mut/wt) | Son<br>(mut/wt) | Mother<br>(mut/wt) | Father<br>(mut/wt) | Brother<br>(wt/wt) |
|----------------|--------------------------------|----------------------|-----------------|--------------------|--------------------|--------------------|
| <b>SK3</b>     | <b>CD4<sup>+</sup> T cells</b> | 65%                  | 79%             | 62%                | 63%                | 100%               |
|                | <b>Monocytes</b>               | 82%                  | 75%             | 59%                | 63%                | 97%                |
|                | <b>DCs</b>                     | 39%                  | 68%             | 73%                | 34%                | 95%                |
| <b>RPA-T4</b>  | <b>CD4<sup>+</sup> T cells</b> | 71%                  | 82%             | 92%                | 75%                | 100%               |
|                | <b>Monocytes</b>               | 67%                  | 69%             | 71%                | 84%                | 100%               |
|                | <b>DCs</b>                     | 76%                  | 71%             | 74%                | 46%                | 100%               |
| <b>13B8.2</b>  | <b>CD4<sup>+</sup> T cells</b> | 73%                  | 100%            | 60%                | 66%                | NA                 |
|                | <b>Monocytes</b>               | 62%                  | 78%             | 58%                | 67%                | NA                 |
|                | <b>DCs</b>                     | 77%                  | 89%             | 63%                | 38%                | NA                 |
| <b>EDU-2</b>   | <b>CD4<sup>+</sup> T cells</b> | 55%                  | 65%             | 42%                | 51%                | NA                 |
|                | <b>Monocytes</b>               | 62%                  | 61%             | 51%                | 67%                | NA                 |
|                | <b>DCs</b>                     | 65%                  | 62%             | 56%                | 32%                | NA                 |
| <b>VIT4</b>    | <b>CD4<sup>+</sup> T cells</b> | 65%                  | 21%             | ND                 | ND                 | NA                 |
|                | <b>Monocytes</b>               | 72%                  | 80%             | ND                 | ND                 | NA                 |
|                | <b>DCs</b>                     | 73%                  | 65%             | ND                 | ND                 | NA                 |
| <b>MEM-241</b> | <b>CD4<sup>+</sup> T cells</b> | 67%                  | 80%             | 57%                | 66%                | 100%               |
|                | <b>Monocytes</b>               | 55%                  | 56%             | 54%                | 63%                | 100%               |
|                | <b>DCs</b>                     | 73%                  | 74%             | 67%                | 35%                | 89%                |
| <b>HP276</b>   | <b>CD4<sup>+</sup> T cells</b> | 65%                  | 76%             | 55%                | 62%                | NA                 |
|                | <b>Monocytes</b>               | 58%                  | 59%             | 55%                | 66%                | NA                 |
|                | <b>DCs</b>                     | 71%                  | 66%             | 62%                | 34%                | NA                 |
| <b>OKT4</b>    | <b>CD4<sup>+</sup> T cells</b> | 73%                  | 54%             | 60%                | 63%                | 100%               |
|                | <b>Monocytes</b>               | 57%                  | 56%             | 62%                | 73%                | 100%               |
|                | <b>DCs</b>                     | 66%                  | 71%             | 69%                | 39%                | 100%               |

Results expressed as percentage of median fluorescence intensity (MFI) normalized by the median CD4 MFI levels obtained in 3 healthy donors  $-(\text{MFI of CD4}^+ \text{ T-cells} / \text{MFI of normal HD CD4}^+ \text{ T-cells}) \times 100$ . CD4 expression was undetectable in all peripheral blood leucocyte subsets from the CD4<sup>null</sup> patient. NA: Not available; DCs: dendritic cells. mut: mutated allele. wt: wildtype allele.

**Supplementary Table 3. *In vitro* cytokine production by PB monocytes and dendritic cells of the patient after (LPS+ $\gamma$ IFN) stimulation compared to an age-matched healthy adult processed in parallel.**

| <b>Cytokine</b>               | <b>Subset</b>    | <b>Healthy adult</b> | <b>Patient</b> |
|-------------------------------|------------------|----------------------|----------------|
| <b>IL-1<math>\beta</math></b> | <b>Monocytes</b> | 89%                  | 90%            |
|                               | <b>DCs</b>       | <1%                  | <1%            |
| <b>IL-6</b>                   | <b>Monocytes</b> | 90%                  | 90%            |
|                               | <b>DCs</b>       | 3%                   | 6%             |
| <b>IL-8</b>                   | <b>Monocytes</b> | 84%                  | 93%            |
|                               | <b>DCs</b>       | 3%                   | 9%             |
| <b>IL-10</b>                  | <b>Monocytes</b> | 3%                   | 1%             |
|                               | <b>DCs</b>       | <1%                  | <1%            |
| <b>IL-12</b>                  | <b>Monocytes</b> | 14%                  | 22%            |
|                               | <b>DCs</b>       | 2%                   | 8%             |
| <b>IL-13</b>                  | <b>Monocytes</b> | <1%                  | <1%            |
|                               | <b>DCs</b>       | <1%                  | <1%            |
| <b>TNF<math>\alpha</math></b> | <b>Monocytes</b> | 90%                  | 90%            |
|                               | <b>DCs</b>       | 5%                   | 10%            |
| <b>TGF<math>\beta</math></b>  | <b>Monocytes</b> | 8%                   | 7%             |
|                               | <b>DCs</b>       | <1%                  | <1%            |

Results expressed as percentage of cells positive for each cytokine within monocytes and dendritic cells (DCs).

**Supplementary Table 4. Absolute number of central/effector memory DN T-cells in peripheral blood based on the expression of Th surrogate markers in the patient's relatives compared to age-matched healthy donors.**

|                 | Daughter <sup>mut/wt</sup><br>(normal range) | Son <sup>mut/wt</sup><br>(normal range) | Mother <sup>mut/wt</sup><br>(normal range) | Father <sup>mut/wt</sup><br>(normal range) | Brother <sup>wt/wt</sup><br>(normal range) |
|-----------------|----------------------------------------------|-----------------------------------------|--------------------------------------------|--------------------------------------------|--------------------------------------------|
| <b>CD4-CD8-</b> |                                              |                                         |                                            |                                            |                                            |
| <b>Tregs</b>    | 74 (30-95)                                   | 55 (30-95)                              | 109 (31-132)                               | 122 (31-132)                               | 52 (30-95)                                 |
| <b>TFH</b>      | 56 (55-150)                                  | 61 (55-150)                             | 176 (68-325)                               | 156 (68-325)                               | 112 (55-150)                               |
| <b>Th1</b>      | 92 (27-116)                                  | <b>156</b> (27-116)                     | 98 (45-587)                                | 91 (45-587)                                | 86 (27-116)                                |
| <b>Th2</b>      | 32 (16-70)                                   | 36 (16-70)                              | 79 (25-220)                                | 147 (25-220)                               | 55 (16-70)                                 |
| <b>Th17</b>     | 40 (14-45)                                   | 35 (14-45)                              | 50 (21-120)                                | 99 (21-120)                                | 43 (14-45)                                 |
| <b>Th1/17</b>   | 44 (23-115)                                  | <b>153</b> (23-115)                     | 141 (12-236)                               | 98 (12-236)                                | 63 (23-115)                                |

Results expressed as absolute cell counts per  $\mu\text{L}$  of peripheral blood. Normal reference values are expressed as minimum and maximum for age-matched healthy donors (25). Cell populations with altered absolute cell counts are depicted in bold. mut: mutated allele. wt: wildtype allele.

**Supplementary Table 5. Absolute counts for distinct PB B-cell subpopulations, including memory B-cells and plasmablasts expressing different IgH isotypes and isotype subclasses in the patient's relatives compared to age-matched healthy donors.**

|                             | Daughter <sup>mut/wt</sup><br>(normal range) | Son <sup>mut/wt</sup><br>(normal range) | Mother <sup>mut/wt</sup><br>(normal range) | Father <sup>mut/wt</sup><br>(normal range) | Brother <sup>wt/wt</sup><br>(normal range) |
|-----------------------------|----------------------------------------------|-----------------------------------------|--------------------------------------------|--------------------------------------------|--------------------------------------------|
| <b>B-cells</b>              | 467 (41-470)                                 | 375 (41-470)                            | 198 (42-384)                               | 83 (42-384)                                | 131 (41-470)                               |
| <b>Immature B-cells</b>     | 2 (0.25-24)                                  | <b>29</b> (0.25-24)                     | <b>0.2</b> (0.69-36)                       | 3 (0.69-36)                                | 2.3 (0.25-24)                              |
| <b>Naïve B-cells</b>        | 191 (13-288)                                 | 204 (13-288)                            | 108 (15-280)                               | 55 (15-280)                                | 71 (13-288)                                |
| <b>CD21<sup>+</sup></b>     | 183 (13-284)                                 | 203 (13-284)                            | 103 (14-280)                               | 52 (14-280)                                | 203 (13-284)                               |
| <b>CD21<sup>-</sup></b>     | 8.4 (0.2-9.1)                                | 1.9 (0.2-9.1)                           | 4.5 (0.5-32)                               | 3 (0.5-32)                                 | 3.8 (0.2-9.1)                              |
| <b>Memory B-cells</b>       | <b>267</b> (23-221)                          | 140 (23-221)                            | 88 (8.1-128)                               | 24 (8.1-128)                               | 52 (23-221)                                |
| <b>CD27<sup>+</sup></b>     | <b>246</b> (20-204)                          | 130 (20-204)                            | 76 (12-116)                                | 21 (12-116)                                | 48 (20-204)                                |
| <b>CD27<sup>-</sup></b>     | 18 (1.2-21)                                  | 7.3 (1.2-21)                            | 11 (0.6-16)                                | 1.7 (0.6-16)                               | 3.7 (1.2-21)                               |
| <b>CD21<sup>+</sup></b>     | 237 (19-201)                                 | 130 (19-201)                            | 79 (12-111)                                | 19 (12-111)                                | 46 (19-201)                                |
| <b>CD21<sup>-</sup></b>     | 27 (1.9-28)                                  | 7.3 (1.9-28)                            | 9 (0.8-33)                                 | 3.2 (0.8-33)                               | 5.3 (1.9-28)                               |
| <b>IgM<sup>++D</sup></b>    | 159 (7.9-122)                                | 76 (7.9-122)                            | 20 (2-72)                                  | 10 (2-72)                                  | 25 (7.9-122)                               |
| <b>IgG1<sup>+</sup></b>     | <b>55</b> (3.2-40)                           | 29 (3.2-40)                             | 23 (1.3-31)                                | 3.2 (1.3-31)                               | 12 (3.2-40)                                |
| <b>IgG2<sup>+</sup></b>     | 8 (1.6-30)                                   | 10 (1.6-30)                             | 7 (0.4-12)                                 | 0.5 (0.4-12)                               | 3.9 (1.6-30)                               |
| <b>IgG3<sup>+</sup></b>     | 7 (0.5-8.4)                                  | 3.7 (0.5-8.4)                           | 5 (0.4-8.1)                                | 1.3 (0.4-8.1)                              | 2.0 (0.5-8.4)                              |
| <b>IgG4<sup>+</sup></b>     | <b>2.7</b> (<0.01-2.4)                       | 2.1 (<0.01-2.4)                         | 1.1 (<0.01-2.1)                            | 0.2 (<0.01-2.1)                            | 0.7 (<0.01-2.4)                            |
| <b>IgA1<sup>+</sup></b>     | 21 (2.1-43)                                  | 11 (2.1-43)                             | 21 (1.7-25)                                | 4.8 (1.7-25)                               | 6 (2.1-43)                                 |
| <b>IgA2<sup>+</sup></b>     | 7 (1.2-18)                                   | 5 (1.2-18)                              | 7.7 (0.6-11)                               | 2 (0.6-11)                                 | 2.6 (1.2-18)                               |
| <b>Only-IgD<sup>+</sup></b> | <b>2.9</b> (<0.01-2.4)                       | 0.8 (<0.01-2.4)                         | <b>2</b> (<0.01-0.2)                       | 0.2 (<0.01-0.2)                            | <0.01 (<0.01-2.4)                          |
| <b>Plasmablasts</b>         | 6.4 (1.1-25)                                 | 1.9 (1.1-25)                            | 1.4 (0.14-18)                              | 0.9 (0.14-18)                              | 1.3 (1.1-25)                               |
| <b>IgM<sup>+</sup></b>      | 0.9 (0.05-4.7)                               | 0.1 (0.05-4.7)                          | 0.05 (0.01-0.8)                            | 0.04 (0.01-0.8)                            | 0.03 (0.05-4.7)                            |
| <b>IgG1<sup>+</sup></b>     | 0.7 (0.05-4.4)                               | 0.2 (0.05-4.4)                          | 0.02 (0.01-0.6)                            | 0.09 (0.01-0.6)                            | 0.08 (0.05-4.4)                            |
| <b>IgG2<sup>+</sup></b>     | 0.2 (<0.01-2.6)                              | 0.2 (<0.01-2.6)                         | <0.01 (<0.01-1.6)                          | <0.01 (<0.01-1.6)                          | 0.1 (<0.01-2.6)                            |
| <b>IgG3<sup>+</sup></b>     | <0.01 (<0.01-0.3)                            | <0.01 (<0.01-0.3)                       | <0.01 (<0.01-0.2)                          | <0.01 (<0.01-0.2)                          | <0.01 (<0.01-0.3)                          |
| <b>IgG4<sup>+</sup></b>     | 0.04 (<0.01-0.4)                             | 0.02 (<0.01-0.4)                        | <0.01 (<0.01-0.1)                          | <0.01 (<0.01-0.1)                          | <0.01 (<0.01-0.4)                          |
| <b>IgA1<sup>+</sup></b>     | 1.7 (0.3-6.9)                                | 0.9 (0.3-6.9)                           | 0.7 (0.004-3.3)                            | 0.5 (0.04-3.3)                             | 0.4 (0.3-6.9)                              |
| <b>IgA2<sup>+</sup></b>     | 1.7 (0.2-4.2)                                | 0.2 (0.2-4.2)                           | 0.4 (0.06-1.2)                             | 0.2 (0.06-1.2)                             | 0.6 (0.2-4.2)                              |
| <b>Only-IgD<sup>+</sup></b> | 0.1 (<0.01-1.1)                              | 0.02 (<0.01-1.1)                        | <0.01 (<0.01-0.2)                          | <0.01 (<0.01-0.2)                          | <0.01 (<0.01-1.1)                          |

Results expressed as absolute cell counts per  $\mu\text{L}$  of peripheral blood. Normal reference values are expressed as minimum and maximum for age-matched healthy donors (23). Cell populations with altered absolute cell counts are depicted in bold. mut: mutated allele. wt: wildtype allele.
